# Supplementary material
Source: PubMed Central journal article supplement (PMC7704640)
Supplement: NIHMS1636949-supplement-1.pdf [file NIHMS1636949-supplement-1.pdf]

**Supplementary Table S1:** Mean and standard deviation of sleep stage variables for patients with COS and controls. F-values are indicated in the fourth column of the table (p-values in parentheses). Wake after sleep onset (wake time in minutes between the first and the last sleep epoch), sleep latency (time in minutes until the first occurrence of stage 2 sleep), sleep efficiency (total sleep time divided by total time in bed), rapid eye movement (REM) sleep latency (time in minutes from sleep onset until the first occurrence of REM sleep), stage 2 (minutes in stage 2 divided by total sleep time), slow wave sleep (minutes of stages 3 and 4 divided by total sleep time), REM sleep (minutes of stage REM divided by total sleep time).

| <b>Sleep Parameter</b>       | <b>Patients</b>     | <b>Controls</b>    | <b>ANOVA</b>     |
|------------------------------|---------------------|--------------------|------------------|
| Total Sleep Time (min)       | 544.06<br>(±144.01) | 489.31<br>(±69.75) | 1.78<br>(p=0.18) |
| Wake After Sleep Onset (min) | 7.41<br>(±7.97)     | 7.56<br>(±6.07)    | 0.00<br>(p=0.95) |
| Sleep Latency (min)          | 29.34<br>(±22.78)   | 19.91<br>(±14.08)  | 1.99<br>(p=0.17) |
| Sleep Efficiency (%)         | 86.10<br>(±17.97)   | 88.63<br>(±3.31)   | 0.31<br>(p=0.58) |
| REM Sleep Latency (min)      | 124.25<br>(±84.30)  | 75.97<br>(±29.46)  | 4.30<br>(p=0.05) |
| Stage 2 (%)                  | 50.02<br>(±21.36)   | 42.45<br>(±11.08)  | 1.58<br>(p=0.22) |
| Slow Wave Sleep (%)          | 32.61<br>(±24.82)   | 36.30<br>(±11.36)  | 0.29<br>(p=0.59) |
| REM Sleep (%)                | 17.37<br>(±7.99)    | 21.25<br>(±7.14)   | 2.10<br>(p=0.16) |
